# Supplementary material for: Multi-functional silicananotubes as a versatile nanoscale component for biology-driven sensing applications
Source: Royal Society of Chemistry journal article supplement (doi:10.1039/c1jm14679c), 2011-12-13
Supplement: c1jm14679c.pdf [file c1jm14679c.pdf]

## Electronic Supplementary Information

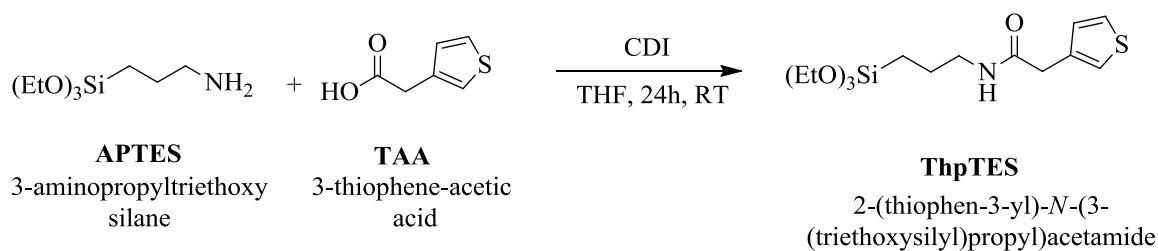

**Scheme S1.** Synthetic strategy for the preparation of Thp-TES

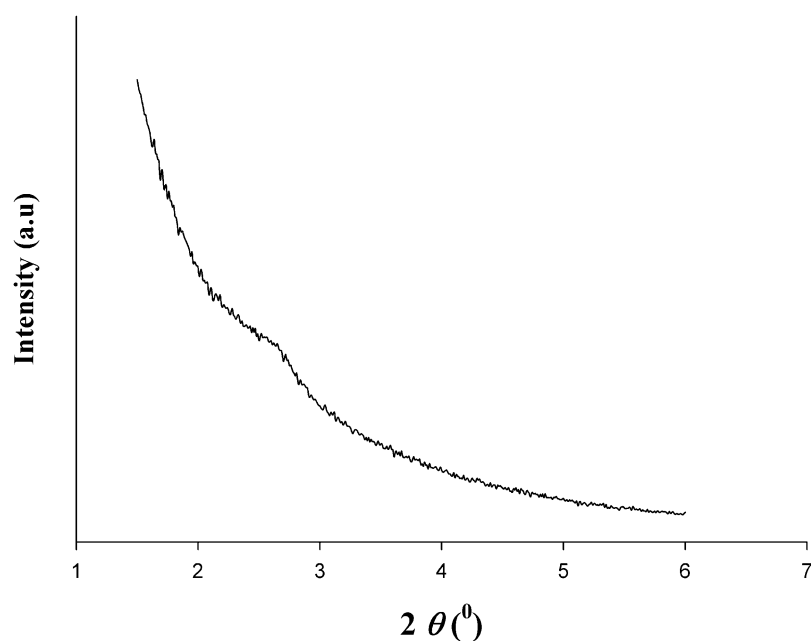

**Figure S1:** XRD pattern of bare SNTs

|                   | C%    | H%   | N%   | S%    | O%    | Total % |
|-------------------|-------|------|------|-------|-------|---------|
| SNTs              | 0.11  | 1.42 | 0    | 0     | 10.04 | 11.57   |
| SNTs-g-Thp        | 8.42  | 1.6  | 0.85 | 1.71  | 6.52  | 19.1    |
| SNT-g-Thp/PTAA    | 27.53 | 2.2  | 0.45 | 11.23 | 15.68 | 57.09   |
| SNT-g-Thp/PTAA/SH | 27.35 | 2.52 | 0.97 | 11.71 | 13.47 | 56.02   |

**Table S1:** EA data

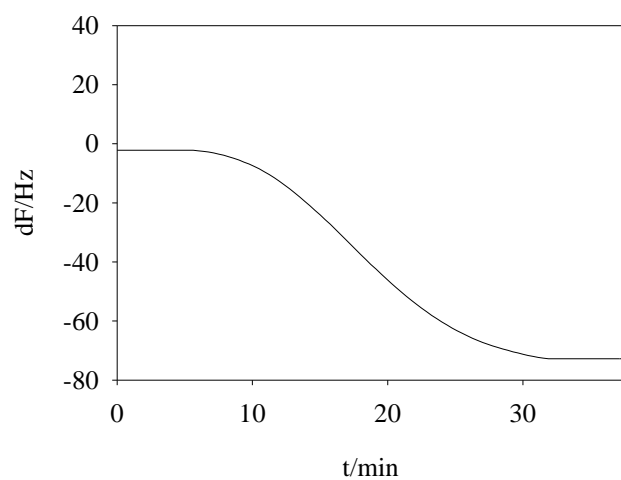

**Figure S2:** QCM measurement of SNT-g-Thp/PTAA/SH NC (1.5mg/mL EtOH) binding to gold electrode.
